# Supplementary material for: Comparative Analysis of Bariatric Surgery Outcomes and Preoperative Body Composition in Obese Patients with Binge-Eating Disorders versus Simple Obesity Patients: A Retrospective Study
Source: Research Square preprint supplement (doi:10.21203/rs.3.rs-7463390/v1), 2025-09-12
Supplement: Supplementary file 1 [file 5fd8519e949f89248a7beae1.docx]

| variable | Male |  | Female |  |
| --- | --- | --- | --- | --- |
| NBED BED | P | NBED BED | P |
| sample | 64 45 |  | 87 106 |  |
| Age(years) | 35.4±9.7 33.1±8.3 | 0.197# | 31(26,36) 30(25,35) | 0.183* |
| Weight (kg) | 119.4±22.6 120.0(109.2,136.4) | 0.342* | 93.7(83.4,103.5) 97.2(86.9,107.5) | 0.097* |
| BMI (kg/m) | 38.0(33.7,42.8) 39.2(37.0,43) | 0.276* | 35.8(32.6,39.1) 36.5(33.9,40.7) | 0.114* |
| Neck Circumference(cm) | 44.1(41.8,47.1) 45.3(43.3,47.8) | 0.114* | 41.7±3.4 42.4(39.8,44.7) | 0.311* |
| Chest Circumference (cm) | 118.6±7.3 121.1(116.1,124.2) | 0.128* | 109.5±7.0 111.1±7.2 | 0.129# |
| AbdominalCircumference(cm) | 126.6±14.5 127.5±10.6 | 0.281# | 113.4±7.2 114.7.1±10.5 | 0.391# |
| Hip Circumference(cm) | 120.2(112.3,126.2) 121.8(115.8,125.7) | 0.198* | 112.8(107.7,117.8)114.7±7.0 | 0.078* |
| Waist - Hip Ratio | 1.06±0.07 1.05(1.01,1.09) | 0.642* | 1.0±0.05 1.0±0.06 | 0.673# |
| Arm Circumference (cm) | 42.8(38.7,46.4) 42.7(41.2,46.9) | 0.305* | 39.0(36.2,41.3) 39.8(37.1,42.9) | 0.148* |
| Thigh Circumference(cm) | 65.0±5.0 67.0±4.8 | 0.050# | 61.5±4.1 62.5±4.2 | 0.108# |
| Total Body Water | 51.1±7.3 52.1±6.8 | 0.511# | 36.6(33.8,39.8) 37.1(34.4,40.9) | 0.249* |
| protein | 13.7±1.9 14.0±1.2 | 0.435# | 9.9±1.2 10.1±1.2 | 0.247# |
| Minerals | 4.6±0.7 4.7±0.7 | 0.642# | 3.4±0.4 3.4±0.4 | 0.266# |
| Body Fat Mass | 48.7(37.3,60.3) 51.2 (41.8,58.0) | 0.396* | 44.4±9.4 45.9 (39.2,53.0) | 0.114* |
| Soft Lean Mass | 65.7±9.3 66.9±8.7 | 0.496# | 47.5±5.9 50.5(46.7,59.4) | 0.278* |
| Fat Free Mass | 69.5±10.0 70.8±9.3 | 0.503# | 50.2±6.2 50.5(46.7,55.5) | 0.279* |
| Skeletal muscle Mass | 39.3±5.8 40.2±5.5 | 0.449# | 27.9± 3.7 28.5±3.6 | 0.268# |
| Percent Body Fat | 41.1±6.1 42.1±5.8 | 0.384# | 46.6(43.9,50.6) 48.0(44.0,50.9) | 0.298* |
| FFM of Arm | 4.2±0.7 4.3±0.6 | 0.700# | 2.8±0.4 2.8(2.6,3.1) | 0.265* |
| FFM of Trunk | 31.7±4.1 32.2±3.9 | 0.597# | 23.5±2.8 23.9±2.8 | 0.280# |
| FFM of Leg | 10.5±1.6 10.9±1.6 | 0.315# | 7.6±1.1 7.8±1.0 | 0.520# |
| BFM of Arm | 4.7(3.1,7.4) 5.3 (3.7,6.7) | 0.427* | 4.1(3.4,5.4) 4.5 (3.5,5.9) | 0.124* |
| BFM of Trunk | 24.4(19.6,27.8) 24.4±3.6 | 0.700* | 21.4±3.6 22.0±3.6 | 0.226# |
| BFM of Leg | 6.4(5.0,7.6) 6.6(5.5,7.5) | 0.271* | 6.2±1.2 6.6±1.4 | 0.037# |
| Basal Metabolic Rate | 1871±213 1898±200 | 0.505# | 1442(1361,1543) 1,460(1380,1567) | 0.402* |
| Visceral Fat Area | 221.1(168.6,261.2) 218.5±37.6 | 0.931* | 201.1±35.5 205.6±33.8 | 0.270# |
| Bone Mineral Content | 3.8±0.6 3.9±0.6 | 0.568# | 2.8±0.4 2.8±0.4 | 0.369# |
| Muscle-Fat ratio | 0.84±0.22 0.81±0.20 | 0.374# | 0.64(0.55,0.70) 0.60 (0.53,0.71) | 0.289* |
| BMR per unit of body weight(BMR(kcal/day/kg)) | 15.9±1.8 15.6±1.6 | 0.289# | 15.5±1.3 15.1(14.1,16.2) | 0.138* |

**Supplementary Table 1** Basic information, obesity indicators and Body Composition in participants with BED or NBED

Note:Data were shown as mean ± standard deviation, median (Q1, Q3). *Mann-Whitney U test; #Independent t-test;
